# Supplementary material
Source: publisher figshare collection journal article supplement (https://acs.figshare.com/ndownloader/files/3871462)
Supplement: Supplementary file 1 [file 3871462]

# ***Supporting Information***

## **Performance Enhancement of Quantum-Dot-Sensitized Solar Cells by Potential-Induced Ionic Layer Adsorption and Reaction**

*I-Ping Liu<sup>†</sup>, Chien-Wei Chang<sup>†</sup>, Hsisheng Teng<sup>†,‡,§</sup>, Yuh-Lang Lee<sup>\*,†,§</sup>*

<sup>†</sup>Department of Chemical Engineering, <sup>‡</sup>Center for Micro/Nano Science and Technology,

<sup>§</sup>Research Center for Energy Technology and Strategy (RCETS), National Cheng Kung University, Tainan 70101, Taiwan

### **AUTHOR INFORMATION**

Corresponding Author: Yuh-Lang Lee

\*E-mail: yllee@mail.ncku.edu.tw.

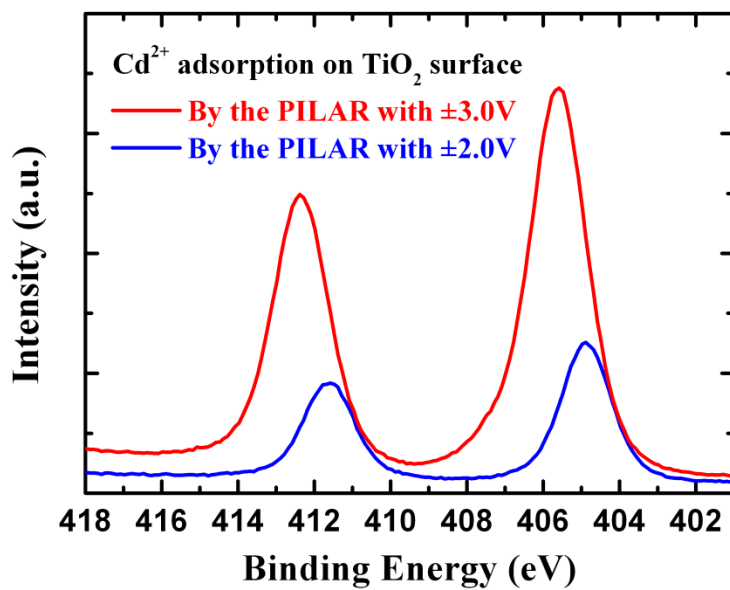

**Figure S1.** XPS spectra of  $\text{Cd}^{2+}$  adsorbed  $\text{TiO}_2$  films prepared by the PILAR method with different applied biases.

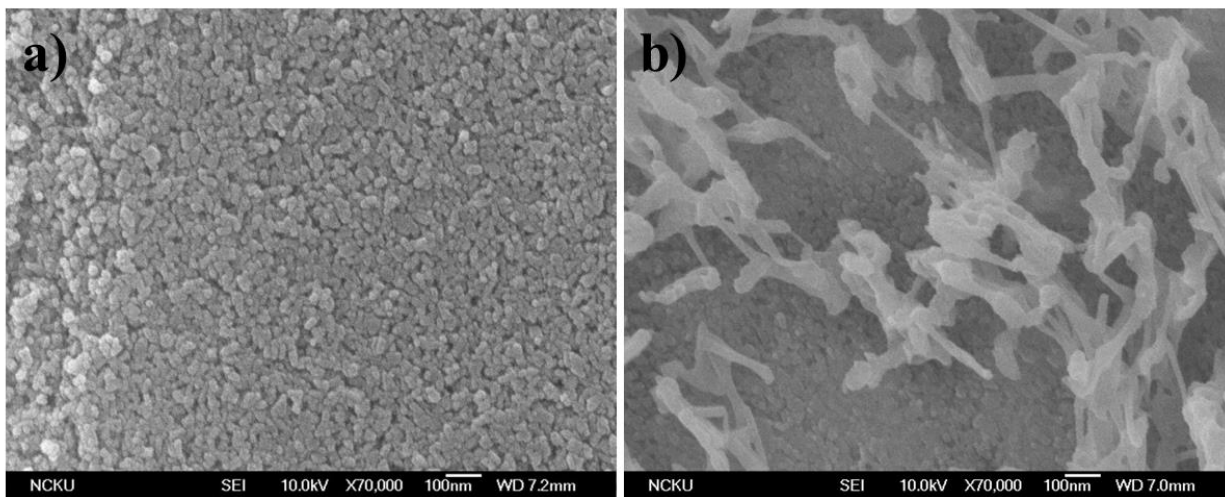

**Figure S2.** Top-view SEM images of PILAR treated  $\text{TiO}_2$  films prepared by the applied biases of (a)  $\pm 2.0\text{V}$  and (b)  $\pm 3.0\text{V}$ .

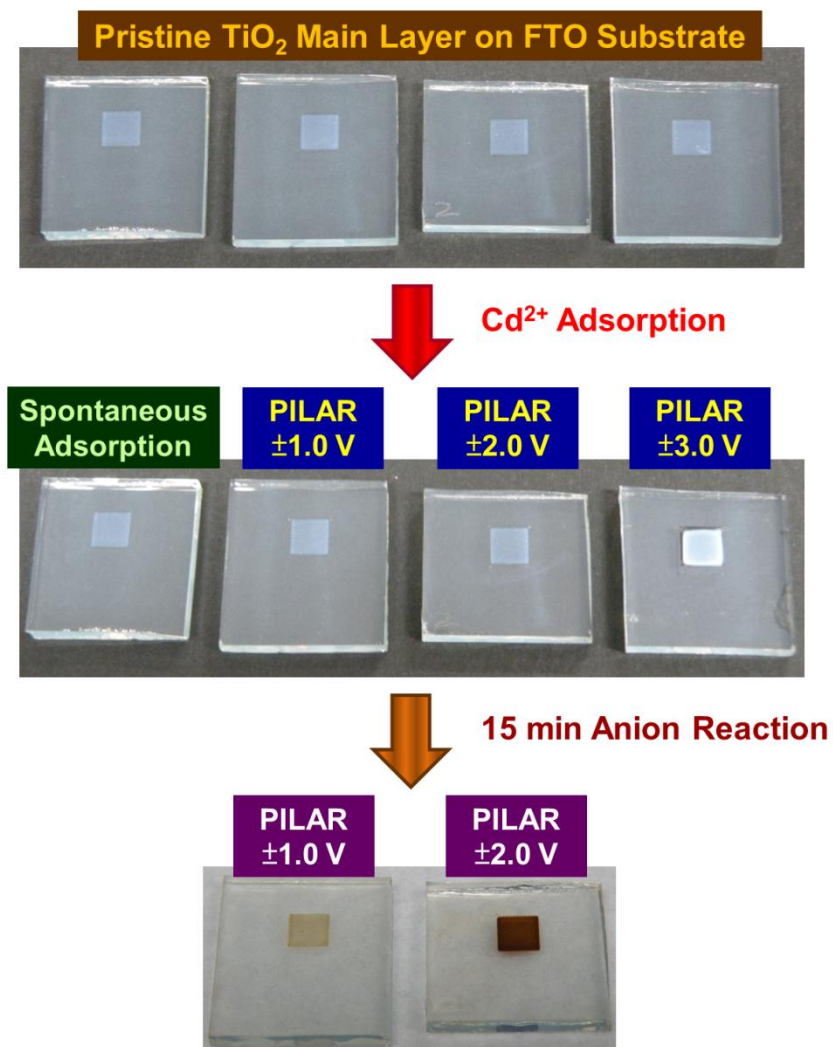

**Figure S3.** Comparative photographs of pristine  $\text{TiO}_2$  films,  $\text{Cd}^{2+}$  anchored  $\text{TiO}_2$  films prepared by different method, and the corresponding CdSe QD-sensitized photoelectrodes.

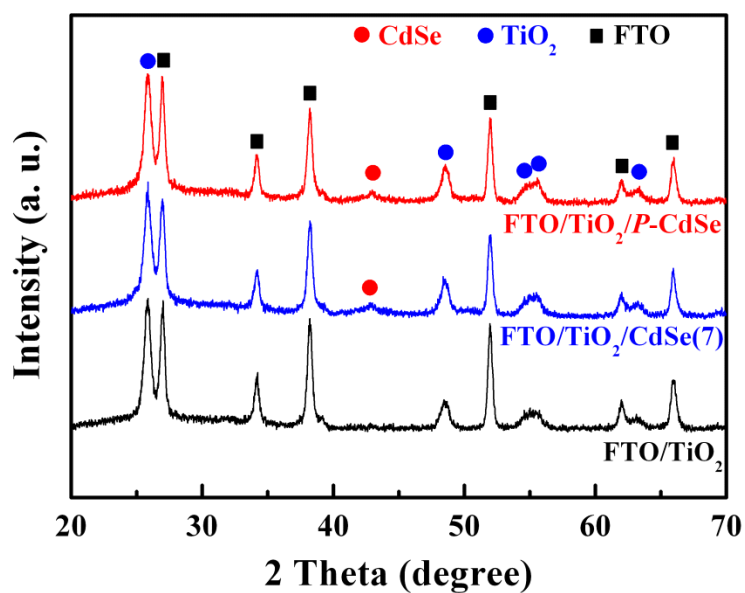

**Figure S4.** XRD patterns of FTO/TiO<sub>2</sub> electrode, FTO/TiO<sub>2</sub>/CdSe(7) electrode fabricated by the SILAR process, and FTO/TiO<sub>2</sub>/P-CdSe electrode prepared by the PILAR technique with 25-min anion reaction. The XRD peaks of FTO, TiO<sub>2</sub>, and CdSe were characterized according to the ref. S1, JCPDS file No. 21–1272, and 19–0191, respectively.

## Supporting Information Reference

[S1] Song, X.; Wang, M.; Deng, J.; Yang, Z.; Ran, C.; Zhang, X.; Yao, X. One-Step Preparation and Assembly of Aqueous Colloidal CdS<sub>x</sub>Se<sub>1-x</sub> Nanocrystals within Mesoporous TiO<sub>2</sub> Films for Quantum Dot-Sensitized Solar Cells. *ACS Appl. Mater. Interfaces* **2013**, 5, 5139–5148.
